# Supplementary material for: Effectiveness of influenza vaccination in working-age adults with diabetes: a population-based cohort study
Source: HighWire-hosted journal article supplement (doi:10.1136/thoraxjnl-2012-203109), 2013-03-27
Supplement: thoraxjnl-2012-203109supp.pdf [file thoraxjnl-2012-203109supp.pdf]

**Effectiveness of influenza vaccination in working age adults with diabetes:  
a population-based cohort study**

**Supplementary Tables and Figures**

Darren Lau, BMSc, Dean T Eurich, PhD, Sumit R Majumdar, MD MPH, Alan Katz,  
MBChB MSc, Jeffrey A Johnson, PhD

## Supplementary Tables

Table S1: Outcome case definitions

Table S1a: List of ICD-10-CA and ICD-9-CM codes comprising an administrative case definition of influenza-like illness (ILI)

| Diagnosis                                                              | ICD-10-CA code      | ICD-9-CM code |
|------------------------------------------------------------------------|---------------------|---------------|
| Cold                                                                   | J00                 | 460           |
| Sinusitis                                                              | J01 or J32          | 461           |
| Pharyngitis                                                            | J02                 | 462           |
| Laryngitis, tracheitis, or laryngotracheitis                           | J04                 | 464           |
| Upper respiratory tract infection                                      | J06.8 or J06.9      | 465.8, 465.9  |
| Influenza                                                              | J10 or J11          | 487 or 488    |
| Viral pneumonia                                                        | J12                 | 480           |
| Pneumonia                                                              | J18                 | 481-486       |
| Acute bronchitis or bronchitis NOS or obstructive bronchitis           | J20 or J40 or J44.8 | 466, 490, 496 |
| Bronchiolitis                                                          | J21                 | 466           |
| Acute lower respiratory tract infection, not otherwise specified       | J22                 | None          |
| COPD with acute lower respiratory tract infection (includes pneumonia) | J44.0               | 491.22        |
| COPD with acute exacerbation                                           | J441                | 491.21        |
| Cough                                                                  | R05                 | 786.2         |
| Pleurisy                                                               | R09.1               | 511           |

Developed using pilot data from emergency departments in Edmonton, Alberta. ICD codes were extracted from randomly selected cases comprising 15% of all emergency department visits with a main ambulatory care diagnosis of influenza.

Table S1b: List of ICD-10-CA and ICD-9-CM codes comprising an administrative case definition of pneumonia and influenza (PI)

| Diagnosis                       | ICD-10-CA code           | ICD-9-CM code     |
|---------------------------------|--------------------------|-------------------|
| Influenza                       | J10 or J11               | 487 or 488        |
| Viral pneumonia                 | J12                      | 480               |
| Pneumonia                       | J13 or J14 or J15 or J16 | 481 or 482 or 483 |
| Pneumonia, organism unspecified | J18                      | 485 or 486        |

Table S2: Adjusted associations between influenza vaccination status and hospitalizations and medical visits for influenza-like illness before, during, and after influenza season – Pharyngitis and sinusitis removed from case definition of influenza-like illness

|                        |          | Pre-season (Beginning Oct. 1) |               |         | Influenza season |               |         | Post-season |               |         |
|------------------------|----------|-------------------------------|---------------|---------|------------------|---------------|---------|-------------|---------------|---------|
| Age group              | Diabetes | IRR                           | CI            | P-value | IRR              | CI            | P-value | IRR         | CI            | P-value |
| Influenza-like illness |          |                               |               |         |                  |               |         |             |               |         |
| Working age            | DM       | 1.00                          | [ 0.97, 1.04] | 0.772   | 0.98             | [ 0.96, 1.01] | 0.167   | 1.06        | [ 1.02, 1.09] | 0.001   |
|                        | DM       | 0.85                          | [ 0.82, 0.88] | 0.000   | 0.86             | [ 0.83, 0.89] | 0.000   | 0.88        | [ 0.84, 0.92] | 0.000   |
| Elderly                | No DM    | 0.80                          | [ 0.77, 0.82] | 0.000   | 0.88             | [ 0.85, 0.90] | 0.000   | 0.92        | [ 0.88, 0.96] | 0.000   |
